# Supplementary material
Source: Springer Nature journal article supplement (https://www.springermedizin.de/resource/supplementary/12884_2013_1001_MOESM6_ESM.pdf/9458742)
Supplement: MOESM6 [file 9458742]

**Table 3.** Normal birth 37-40 weeks of pregnancy (wp). Episiotomy rate

|                                        | <b>Number of hospitals</b>                 | <b>Registered normal births</b> | <b>Episiotomies</b> |             |             |
|----------------------------------------|--------------------------------------------|---------------------------------|---------------------|-------------|-------------|
|                                        | <b>(N)</b>                                 | <b>(N)</b>                      | <b>(N)</b>          | <b>Rate</b> | <b>CI</b>   |
| <b>PUBLIC HOSPITALS</b>                |                                            |                                 |                     |             |             |
|                                        | PUBLICLY FUNDED BIRTHS IN PUBLIC HOSPITALS |                                 |                     |             |             |
| Normal single vaginal birth 37-42 (wp) | 44                                         | 5039                            | 1442                | 28.62%      | 27.28-29.95 |
| <b>PRIVATE HOSPITALS</b>               |                                            |                                 |                     |             |             |
|                                        | PRIVATE FUNDED BIRTHS IN PRIVATE HOSPITALS |                                 |                     |             |             |
| Normal single vaginal birth 37-42 (wp) | 20                                         | 5242                            | 2003                | 38.21%      | 36.78-39.64 |
